# Supplementary material for: Antibodies to repeat-containing antigens in Plasmodium falciparum are exposure-dependent and short-lived in children in natural malaria infections
Source: eLife. 2023 Feb 15;12:e81401. doi: 10.7554/eLife.81401 (PMC10005774; doi:10.7554/eLife.81401)
Supplement: Figure 2—source data 1. [file elife-81401-fig2-data1.xlsx]

## Sheet: GO analysis
GO cellular component analysis
Analysis Type:	PANTHER Overrepresentation Test
Analyzed List:	Top 100 seroreactive proteins by PhIP-seq
Reference List:	Plasmodium falciparum (all genes in database)
Test Type:	FISHER
Correction:	FDR
GO cellular component	Plasmodium falciparum - REFLIST (5376)	Top 100 seroreactive proteins by PhIP-seq	Top 100 seroreactive proteins by PhIP-seq (expected)	Top 100 seroreactive proteins by PhIP-seq (over/under)	Top 100 seroreactive proteins by PhIP-seq (fold Enrichment)	Top 100 seroreactive proteins by PhIP-seq (raw P-value)	Top 100 seroreactive proteins by PhIP-seq (FDR)
anchored component of plasma membrane (GO:0046658)	25	6	0.48	+	12.41	2.03e-05	0.000819
cell surface (GO:0009986)	34	8	0.66	+	12.16	8.88e-07	5.68e-05
Maurer's cleft (GO:0020036)	90	20	1.74	+	11.49	6.23e-15	4.35e-13
anchored component of membrane (GO:0031225)	28	6	0.54	+	11.08	3.53e-05	0.00129
host cell cytoplasm (GO:0030430)	218	32	4.22	+	7.59	6.22e-19	4.78e-16
host intracellular part (GO:0033646)	218	32	4.22	+	7.59	6.22e-19	2.39e-16
host intracellular region (GO:0043656)	219	32	4.24	+	7.55	7.04e-19	1.8e-16
host cell cytoplasm part (GO:0033655)	204	29	3.95	+	7.35	8.64e-17	1.66e-14
extracellular membrane-bounded organelle (GO:0065010)	54	7	1.04	+	6.7	0.000136	0.00436
symbiont-containing vacuole (GO:0020003)	54	7	1.04	+	6.7	0.000136	0.00418
extracellular organelle (GO:0043230)	55	7	1.06	+	6.58	0.000151	0.00446
intrinsic component of plasma membrane (GO:0031226)	50	6	0.97	+	6.2	0.000608	0.0173
extracellular region (GO:0005576)	77	9	1.49	+	6.04	3.08e-05	0.00118
apical complex (GO:0020007)	58	6	1.12	+	5.35	0.00124	0.0318
apical part of cell (GO:0045177)	60	6	1.16	+	5.17	0.00146	0.0362
plasma membrane (GO:0005886)	122	12	2.36	+	5.08	7.08e-06	0.000388
host cell part (GO:0033643)	361	35	6.98	+	5.01	1.57e-15	2.02e-13
host cellular component (GO:0018995)	365	35	7.06	+	4.96	2.16e-15	2.37e-13
host cell (GO:0043657)	365	35	7.06	+	4.96	2.16e-15	2.07e-13
cell periphery (GO:0071944)	128	12	2.48	+	4.85	1.11e-05	0.00057
integral component of membrane (GO:0016021)	1236	62	23.91	+	2.59	2.79e-15	2.38e-13
intrinsic component of membrane (GO:0031224)	1253	62	24.24	+	2.56	5.38e-15	4.13e-13
membrane (GO:0016020)	1489	70	28.81	+	2.43	1.19e-16	1.82e-14
GO biological process
Analysis Type:	PANTHER Overrepresentation Tes
Analyzed List:	Top 100 seroreactive proteins by PhIP-seq
Reference List:	Plasmodium falciparum (all genes in database)
Test Type:	FISHER
Correction:	FDR
GO biological process	Plasmodium falciparum - REFLIST (5376)	Top 100 seroreactive proteins by PhIP-seq	Top 100 seroreactive proteins by PhIP-seq (expected)	Top 100 seroreactive proteins by PhIP-seq (over/under)	Top 100 seroreactive proteins by PhIP-seq (fold Enrichment)	Top 100 seroreactive proteins by PhIP-seq (raw P-value)	Top 100 seroreactive proteins by PhIP-seq (FDR)
multi-organism process (GO:0051704)	12	4	0.23	+	17.23	0.000187	0.0331
entry into host (GO:0044409)	35	7	0.68	+	10.34	1.13e-05	0.00321
modulation by symbiont of host erythrocyte aggregation (GO:0020013)	73	14	1.41	+	9.91	5.57e-10	3.94e-07
modulation of process of other organism involved in symbiotic interaction (GO:0051817)	74	14	1.43	+	9.78	6.52e-10	3.69e-07
modulation by symbiont of host cellular process (GO:0044068)	74	14	1.43	+	9.78	6.52e-10	3.08e-07
modulation by symbiont of host process (GO:0044003)	74	14	1.43	+	9.78	6.52e-10	2.64e-07
modulation of process of other organism (GO:0035821)	74	14	1.43	+	9.78	6.52e-10	2.31e-07
movement in host environment (GO:0052126)	38	7	0.74	+	9.52	1.82e-05	0.00468
cell adhesion (GO:0007155)	65	8	1.26	+	6.36	6.22e-05	0.0147
biological adhesion (GO:0022610)	91	11	1.76	+	6.25	2.86e-06	0.0009
cell-cell adhesion (GO:0098609)	63	7	1.22	+	5.74	0.000325	0.0401
pathogenesis (GO:0009405)	75	8	1.45	+	5.51	0.000156	0.0295
biological process involved in interspecies interaction between organisms (GO:0044419)	283	28	5.47	+	5.11	1.4e-12	3.97e-09
adhesion of symbiont to host (GO:0044406)	82	8	1.59	+	5.04	0.000275	0.0371
biological process involved in symbiotic interaction (GO:0044403)	277	27	5.36	+	5.04	5.36e-12	7.6e-09
biological process involved in interaction with host (GO:0051701)	253	24	4.89	+	4.9	1.75e-10	1.65e-07
