# Supplementary material for: Antibodies to repeat-containing antigens in Plasmodium falciparum are exposure-dependent and short-lived in children in natural malaria infections
Source: eLife journal article supplement (doi:10.7554/elife.81401), 2023-02-15

Figure 5 - figure supplement 4

### Effect of Time Since Infection (2-11 years)

#### Repeat-containing peptides

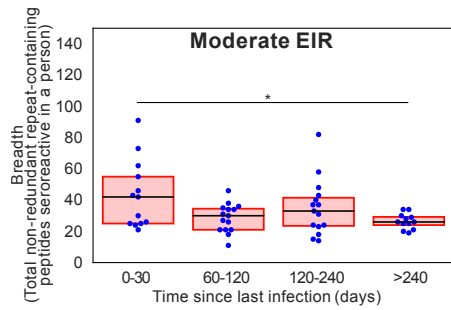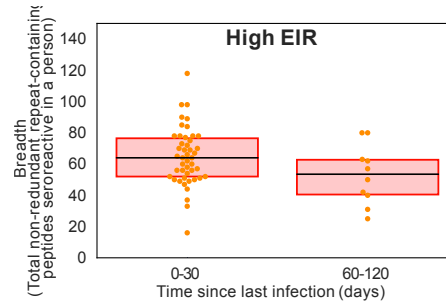

● Moderate  
● High

#### Non-repeat peptides

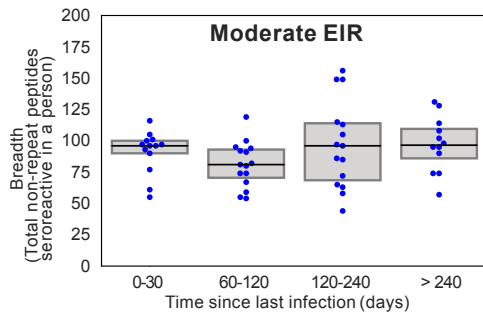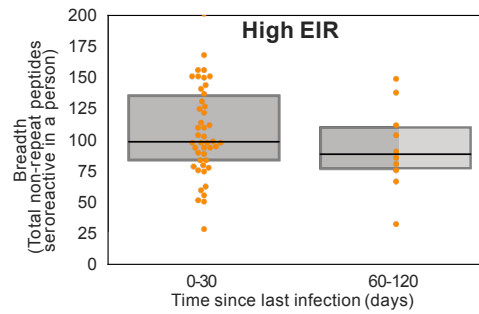

Supplement: supp [file elife-81401-supp-v1.zip]
