# Supplementary material for: Antibodies to repeat-containing antigens in Plasmodium falciparum are exposure-dependent and short-lived in children in natural malaria infections
Source: eLife journal article supplement (doi:10.7554/elife.81401), 2023-02-15
Supplement: supp [file elife-81401-supp-v1.zip]

**Figure 1 - figure supplement 1**

**PEPTIDE PROCESSING STEPS**

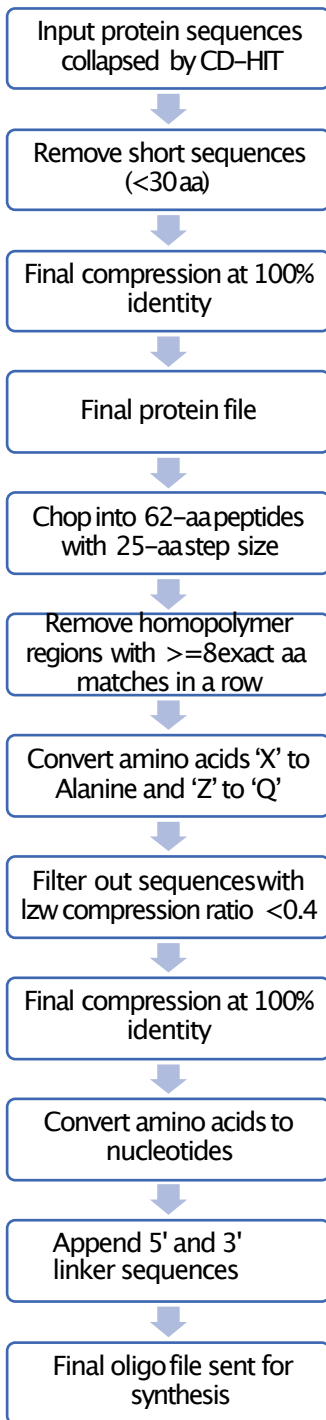

**NT SEQUENCE VERIFICATION**

Do both files (AA and NT) have the same number of sequences?

Are there linker sequences at the 5' and 3' ends of all sequences?

Are all sequences the same length?

Are there any long runs of ( $> 8$ NT) of single nucleotide?

Do the translated sequences match those in the original peptide file?

Are all restriction sites (HINDIII, EcoRI) removed?
