# Supplementary material for: Antibodies to repeat-containing antigens in Plasmodium falciparum are exposure-dependent and short-lived in children in natural malaria infections
Source: eLife journal article supplement (doi:10.7554/elife.81401), 2023-02-15
Supplement: supp [file elife-81401-supp-v1.zip]

**a**

**1** *Edge color* **>10**

Number of inter-protein motifs shared between the two proteins

**Node size**

Number of other seroreactive proteins with which a protein shares inter-protein motifs

48 ● ● 4

**2.5%** *Node color* **100%**

Protein seropositivity

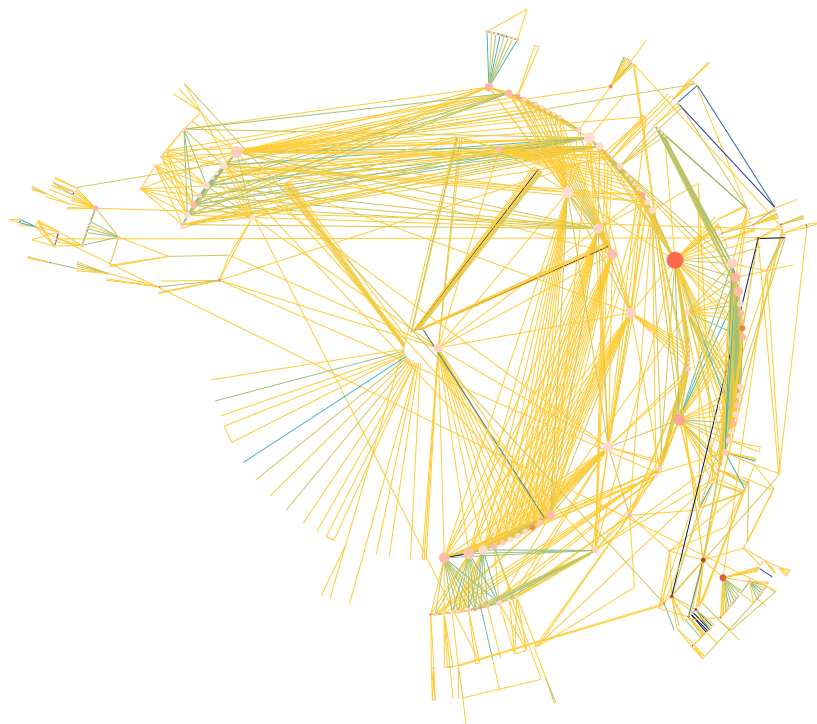[illegible]
