# Supplementary material for: Antibodies to repeat-containing antigens in Plasmodium falciparum are exposure-dependent and short-lived in children in natural malaria infections
Source: eLife journal article supplement (doi:10.7554/elife.81401), 2023-02-15

**Figure 6 - figure supplement 3**

**Motifs present in 2 proteins (n = 709)**

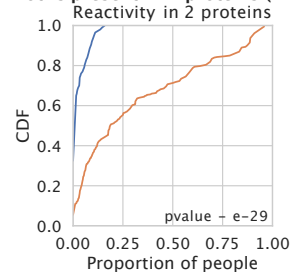

— Background  
— Inter-protein motifs

**Motifs present in 3 proteins (n = 125)**

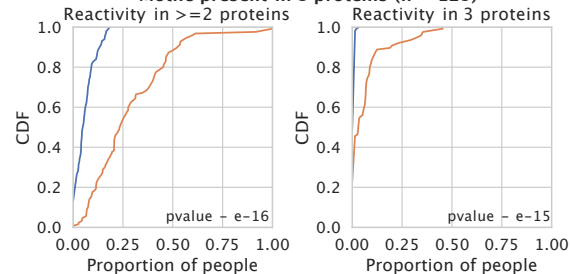

**Motifs present in 4 proteins (n=22)**

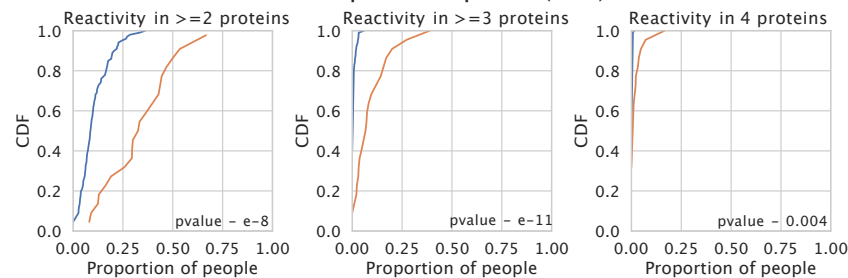

**Motifs present in 5 proteins (n=18)**

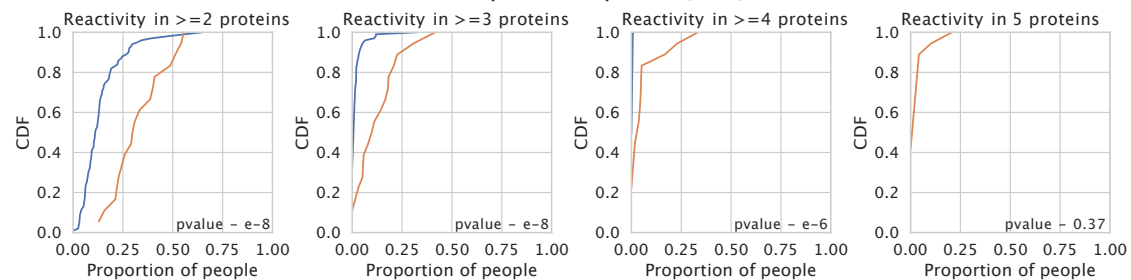

Supplement: supp [file elife-81401-supp-v1.zip]
