# Supplementary figures and images for: Antibodies to repeat-containing antigens in Plasmodium falciparum are exposure-dependent and short-lived in children in natural malaria infections
Source: eLife journal article supplement (doi:10.7554/elife.81401), 2023-02-15

Figure 5 - figure supplement 2

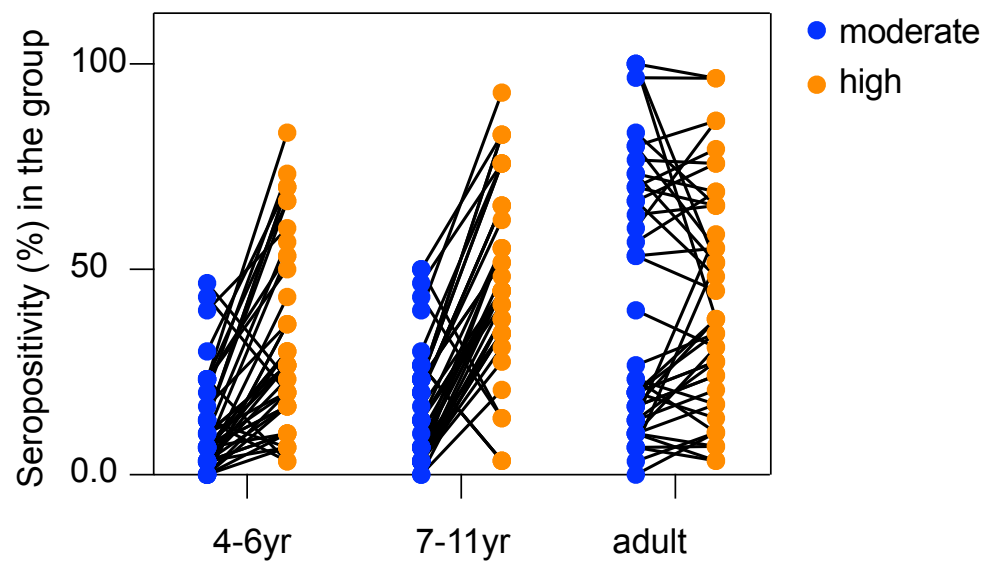

Supplement: supp [file elife-81401-supp-v1.zip]

Figure 6 - figure supplement 2

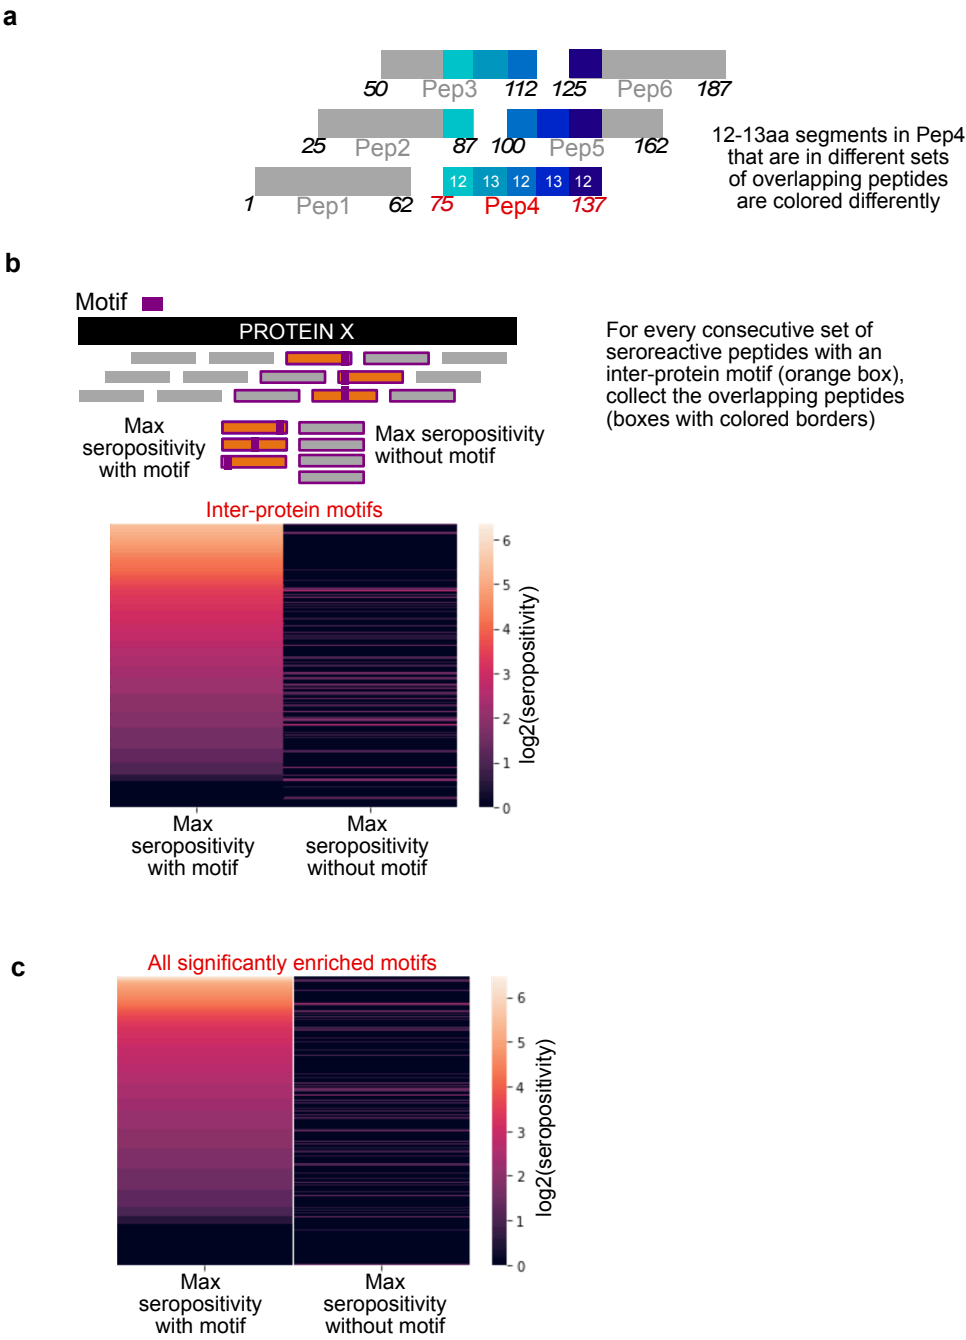

Supplement: supp [file elife-81401-supp-v1.zip]

Figure 2 - figure supplement 3

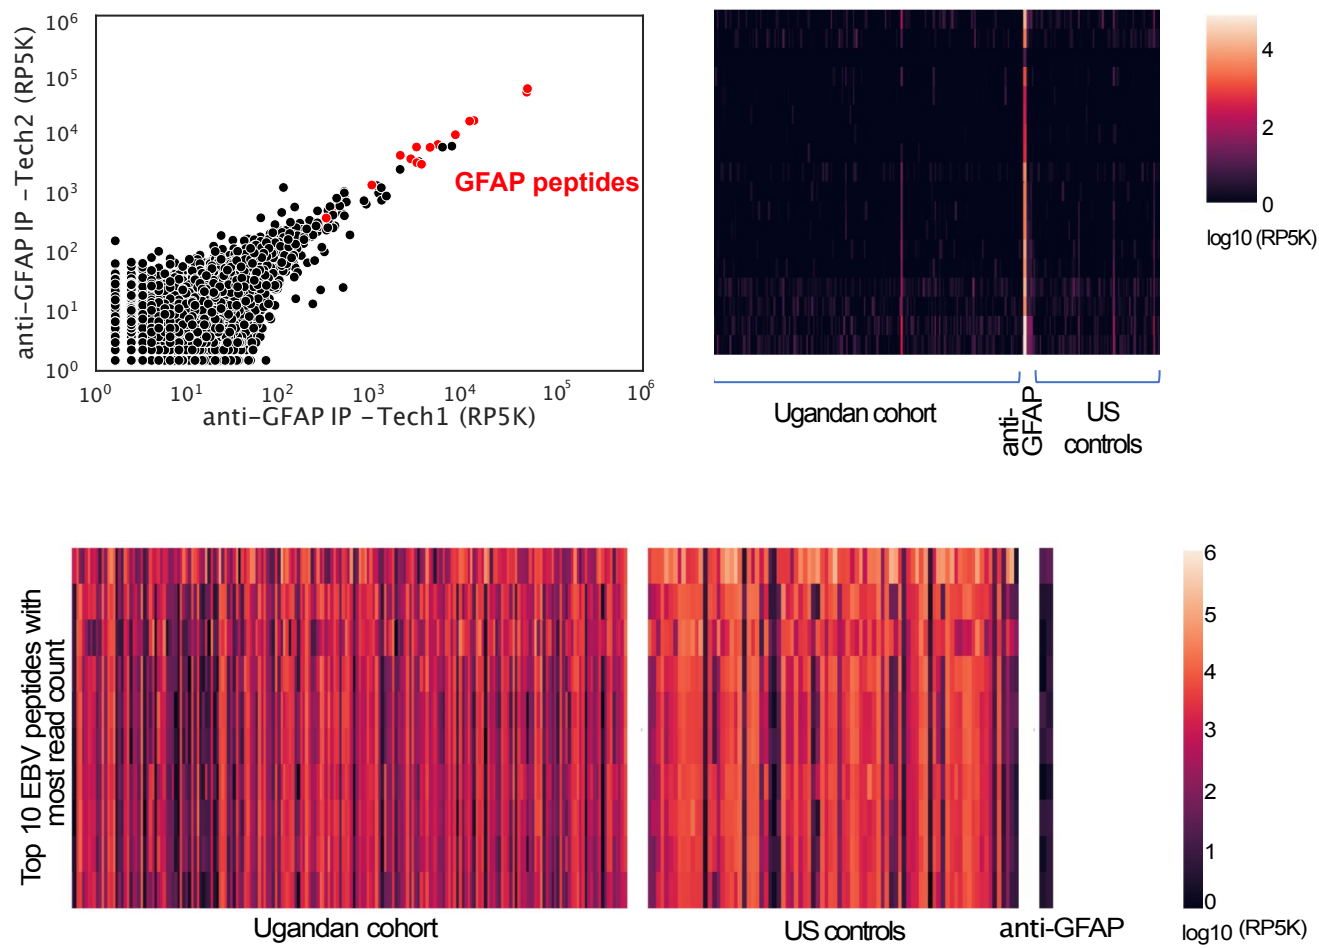

Supplement: supp [file elife-81401-supp-v1.zip]

Figure 2 - figure supplement 4

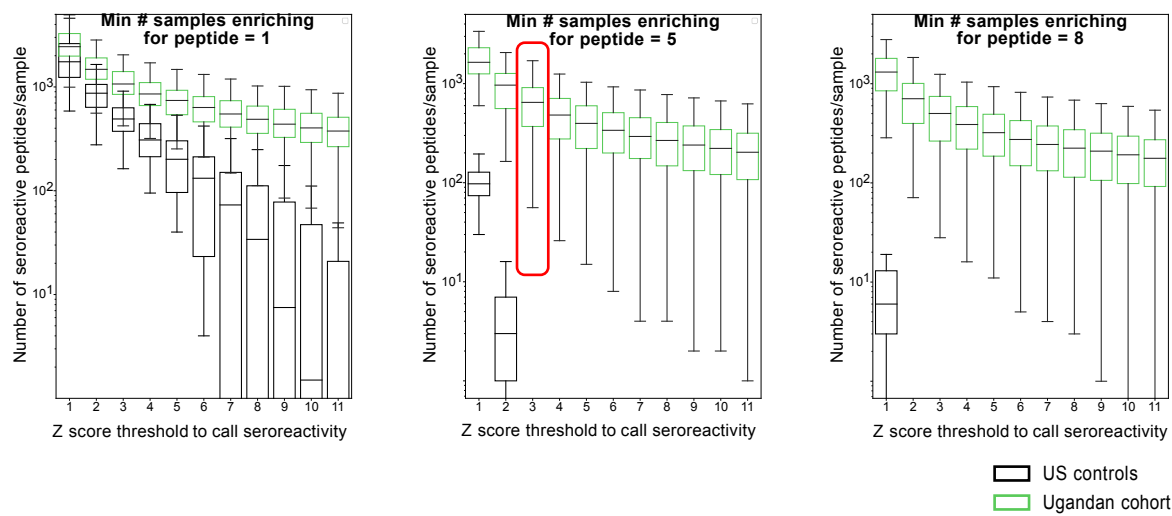

Supplement: supp [file elife-81401-supp-v1.zip]

Figure 2 - figure supplement 2

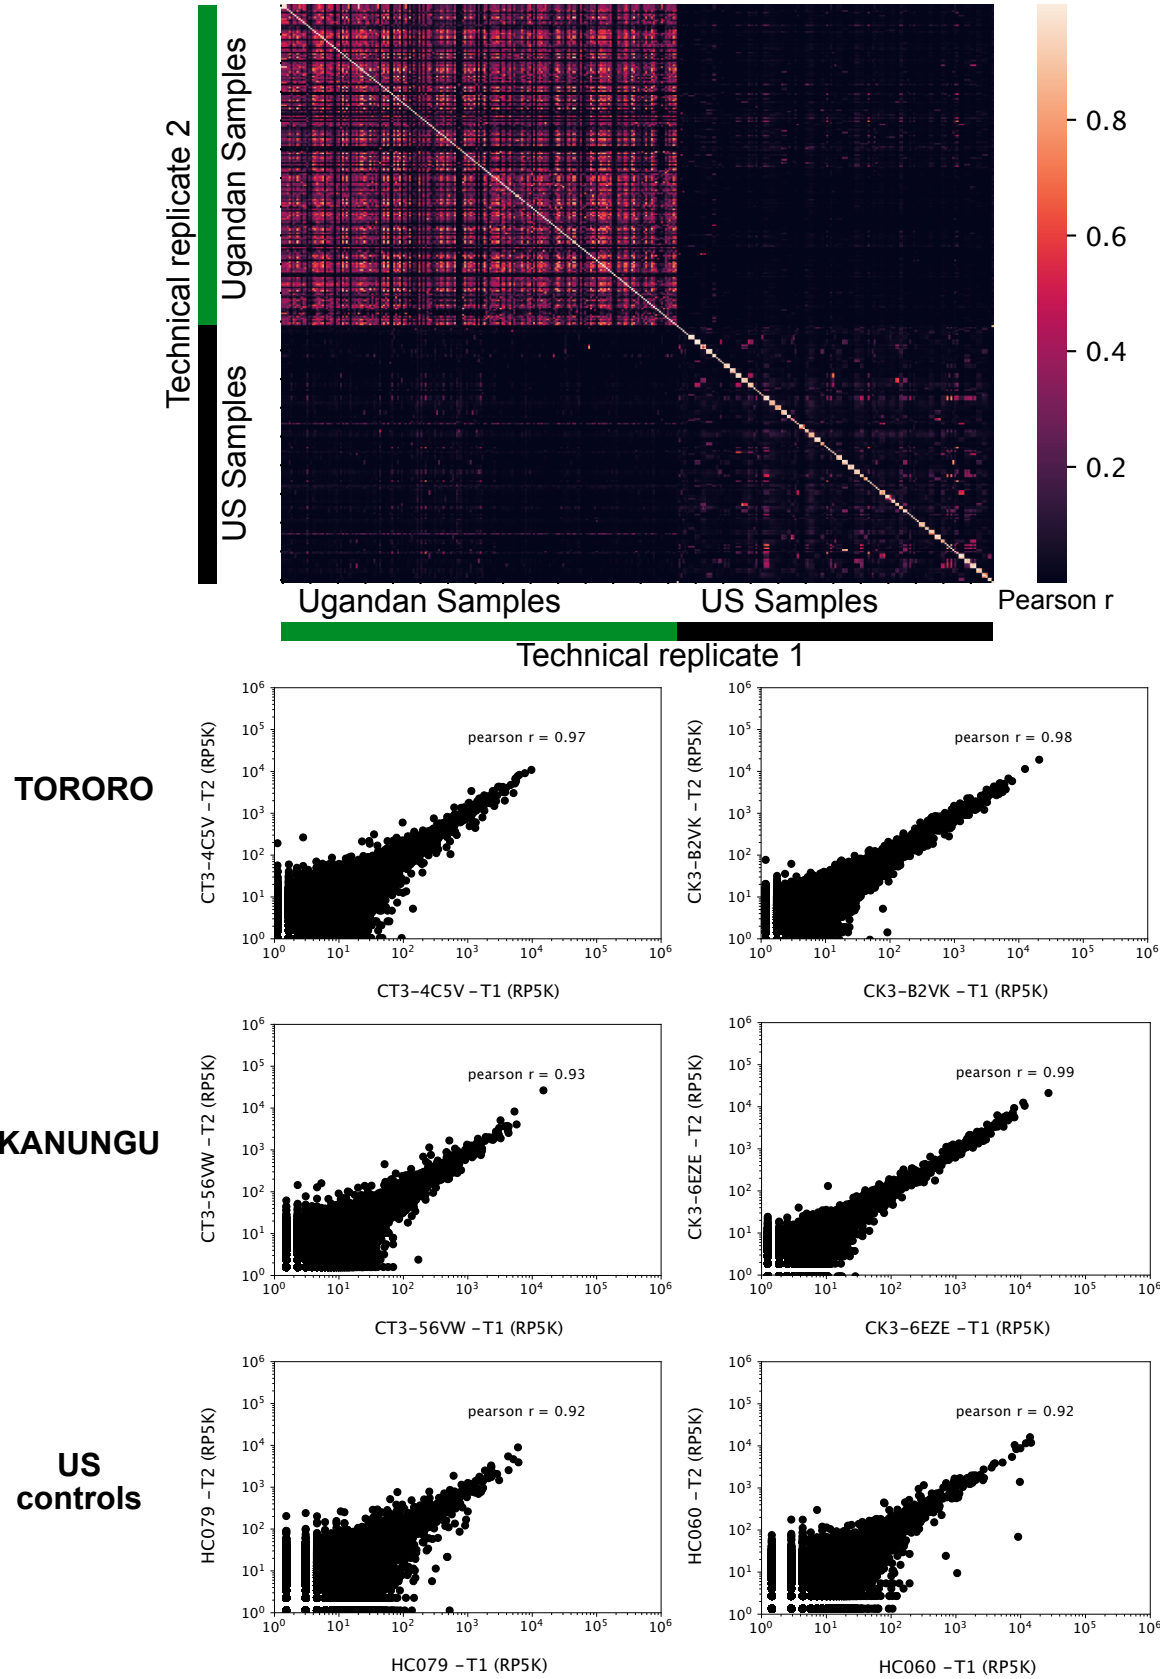

Supplement: supp [file elife-81401-supp-v1.zip]

Figure 5 - figure supplement 3

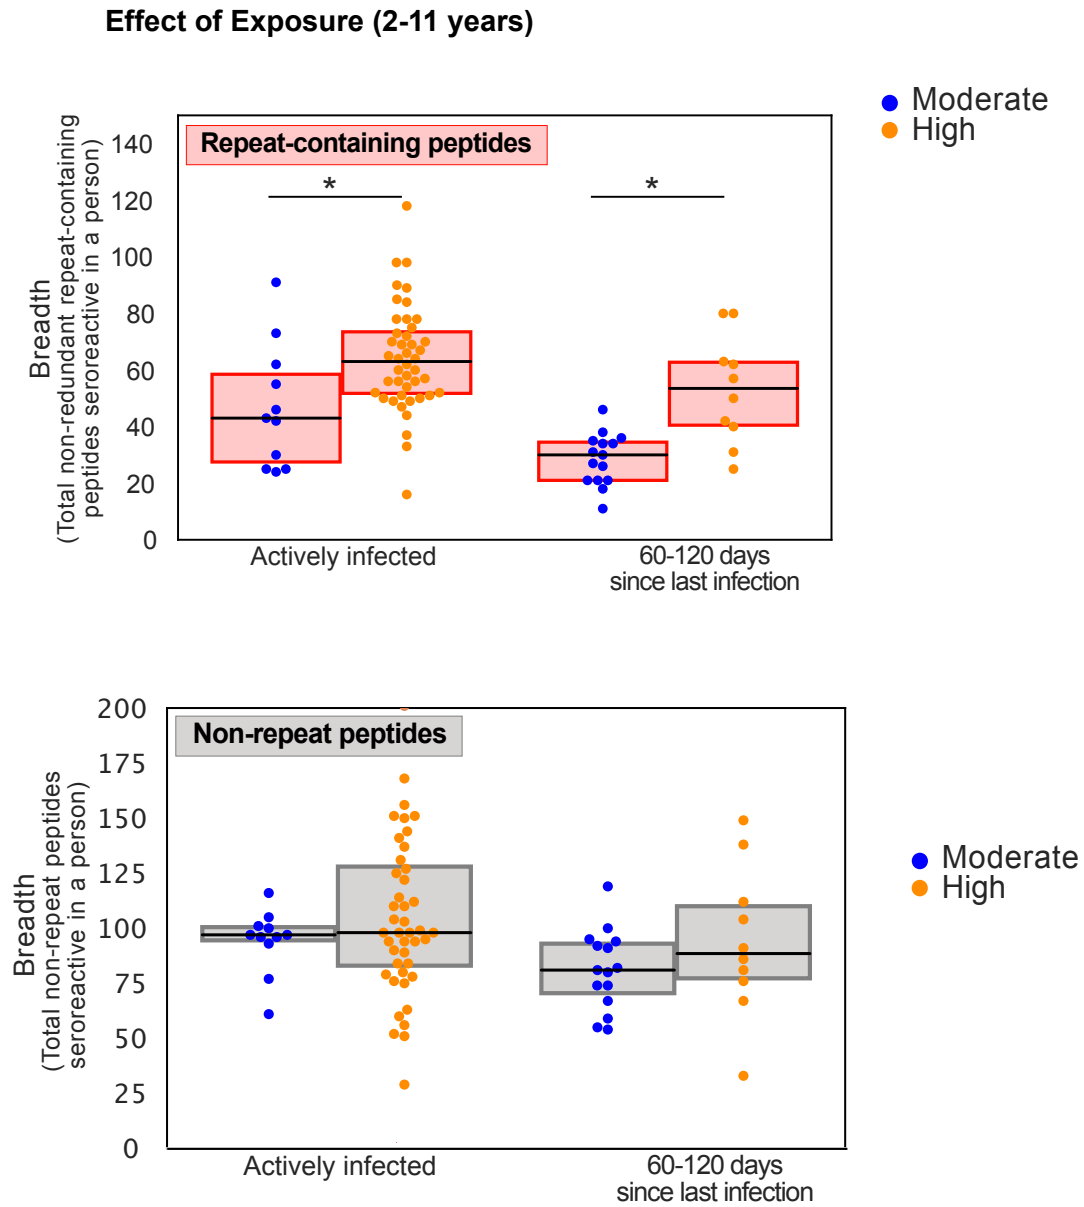

Supplement: supp [file elife-81401-supp-v1.zip]

**Figure 6 - figure supplement 4**

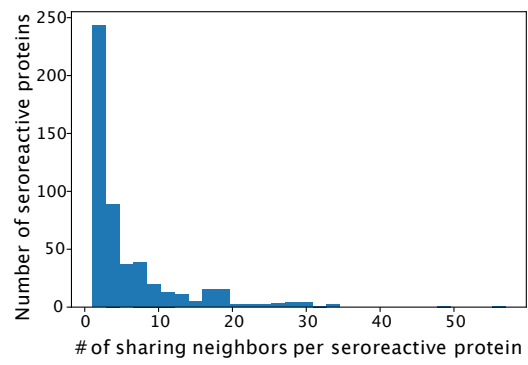

Supplement: supp [file elife-81401-supp-v1.zip]

Figure 2 - figure supplement 6

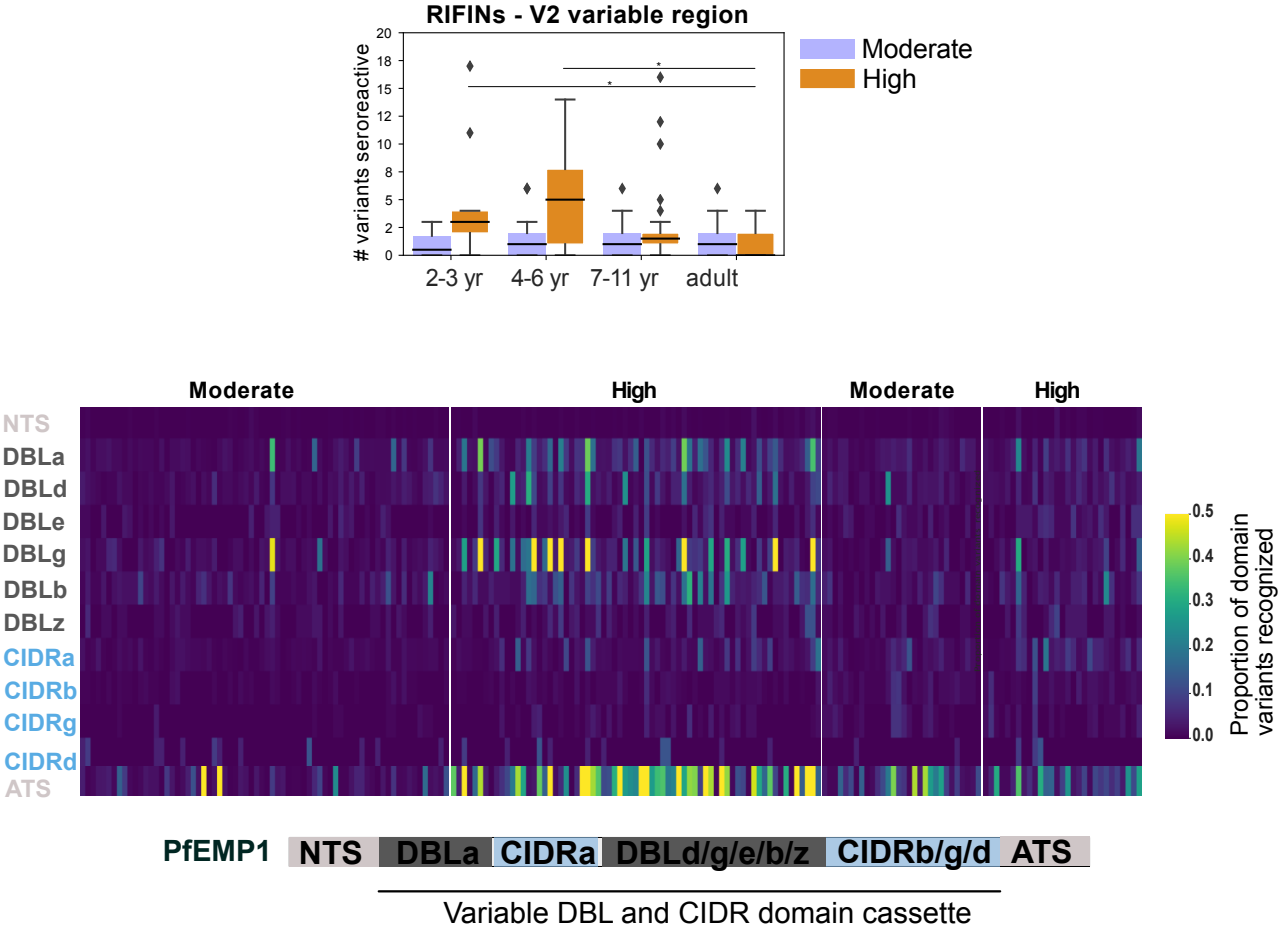

Supplement: supp [file elife-81401-supp-v1.zip]

Figure 5 - figure supplement 1

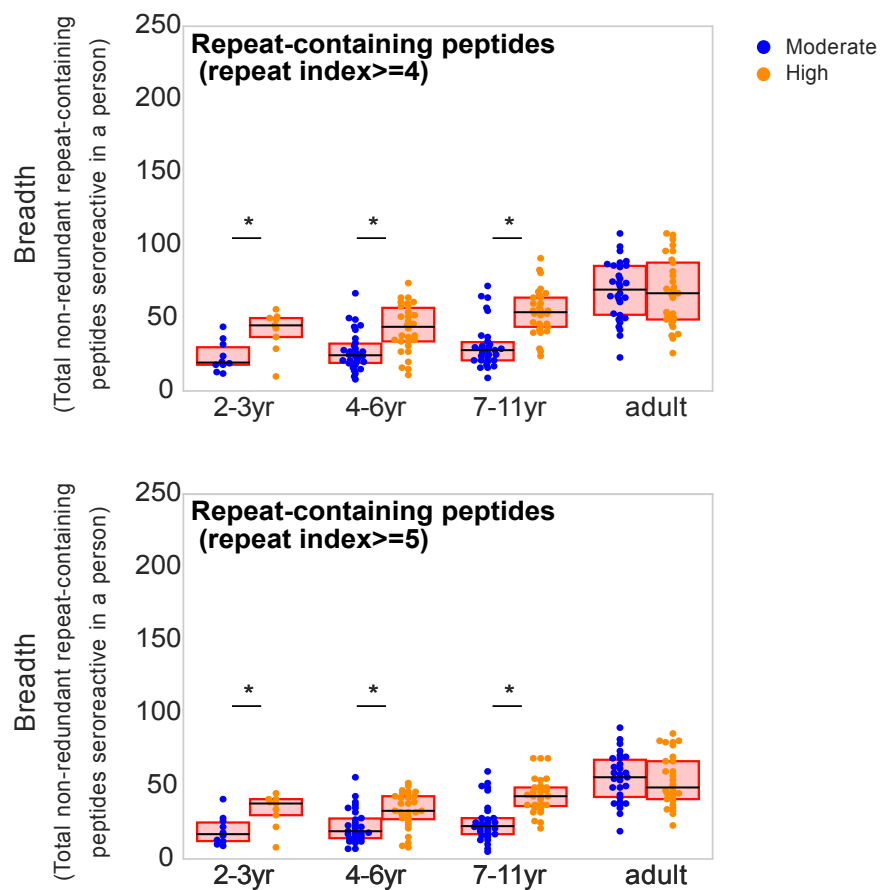

Supplement: supp [file elife-81401-supp-v1.zip]

Figure 6 - figure supplement 1

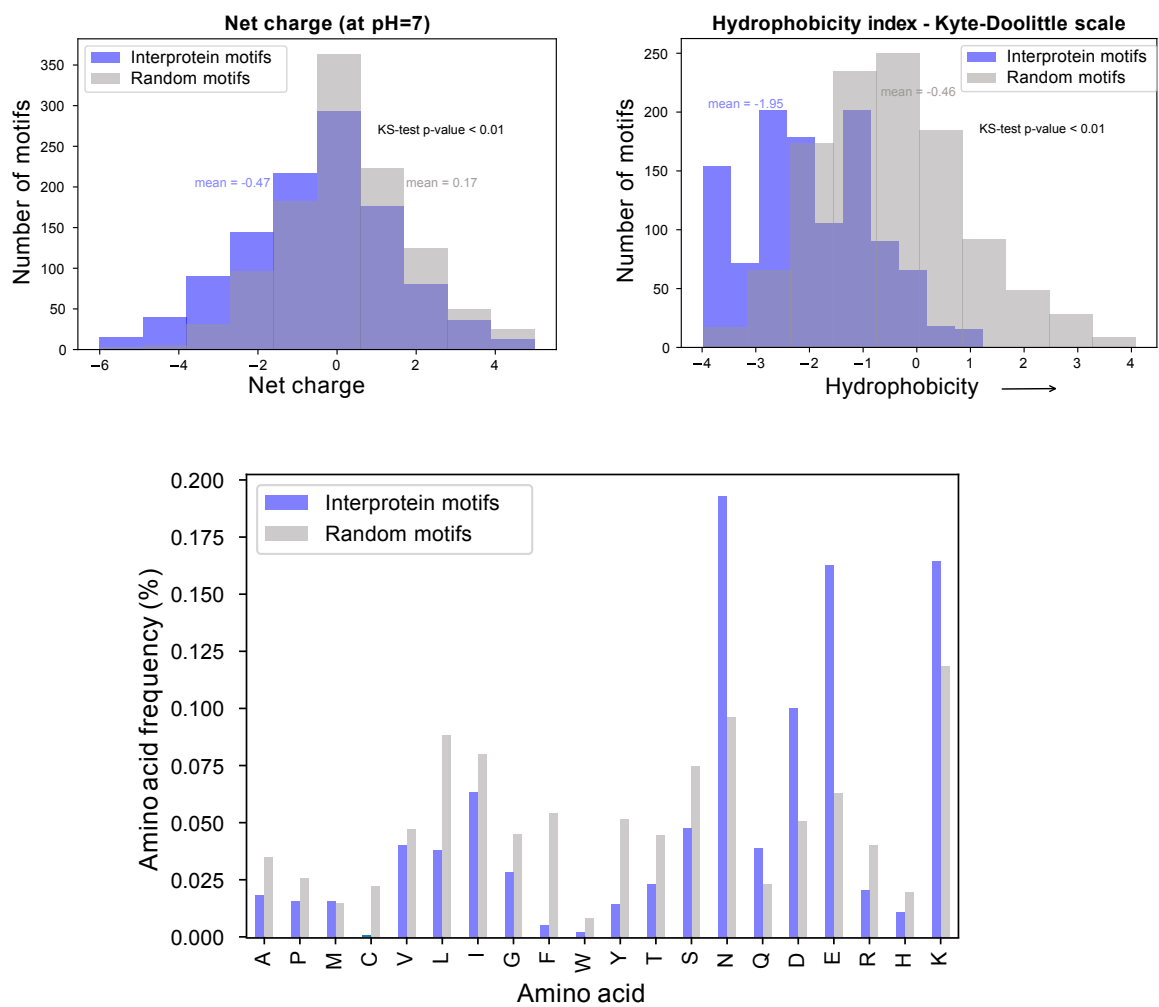

Supplement: supp [file elife-81401-supp-v1.zip]

**Figure 3 - figure supplement 1**

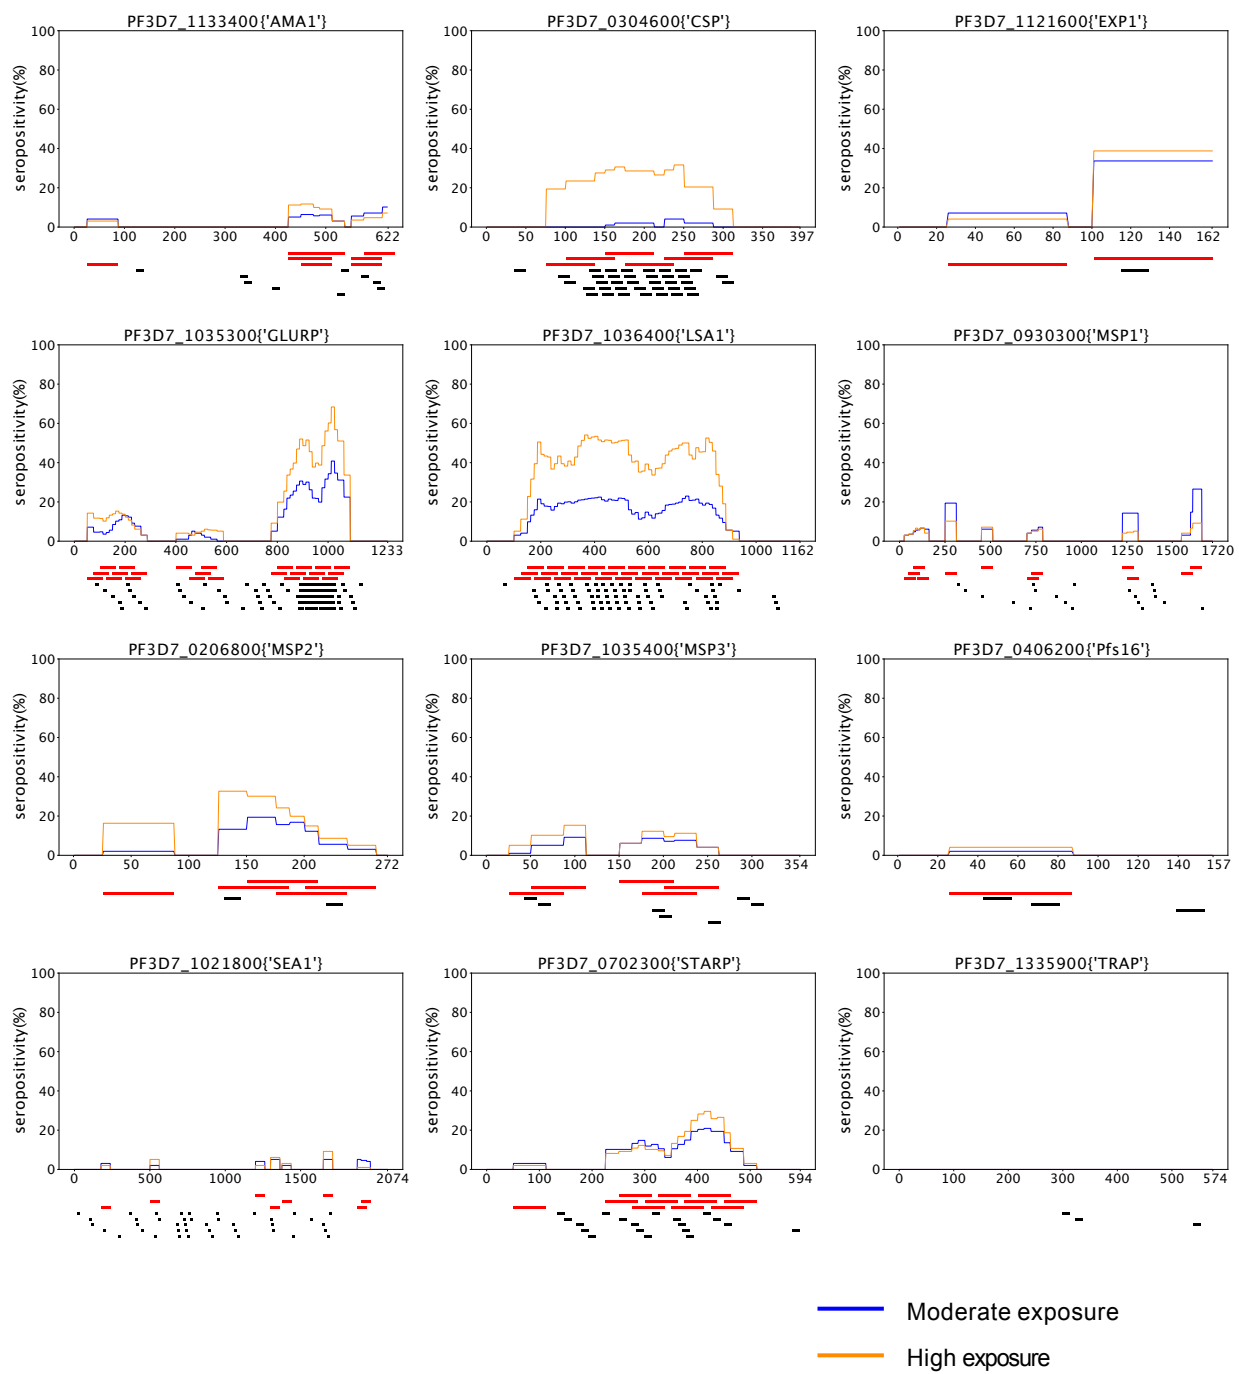

Supplement: supp [file elife-81401-supp-v1.zip]

Figure 4 - figure supplement 1

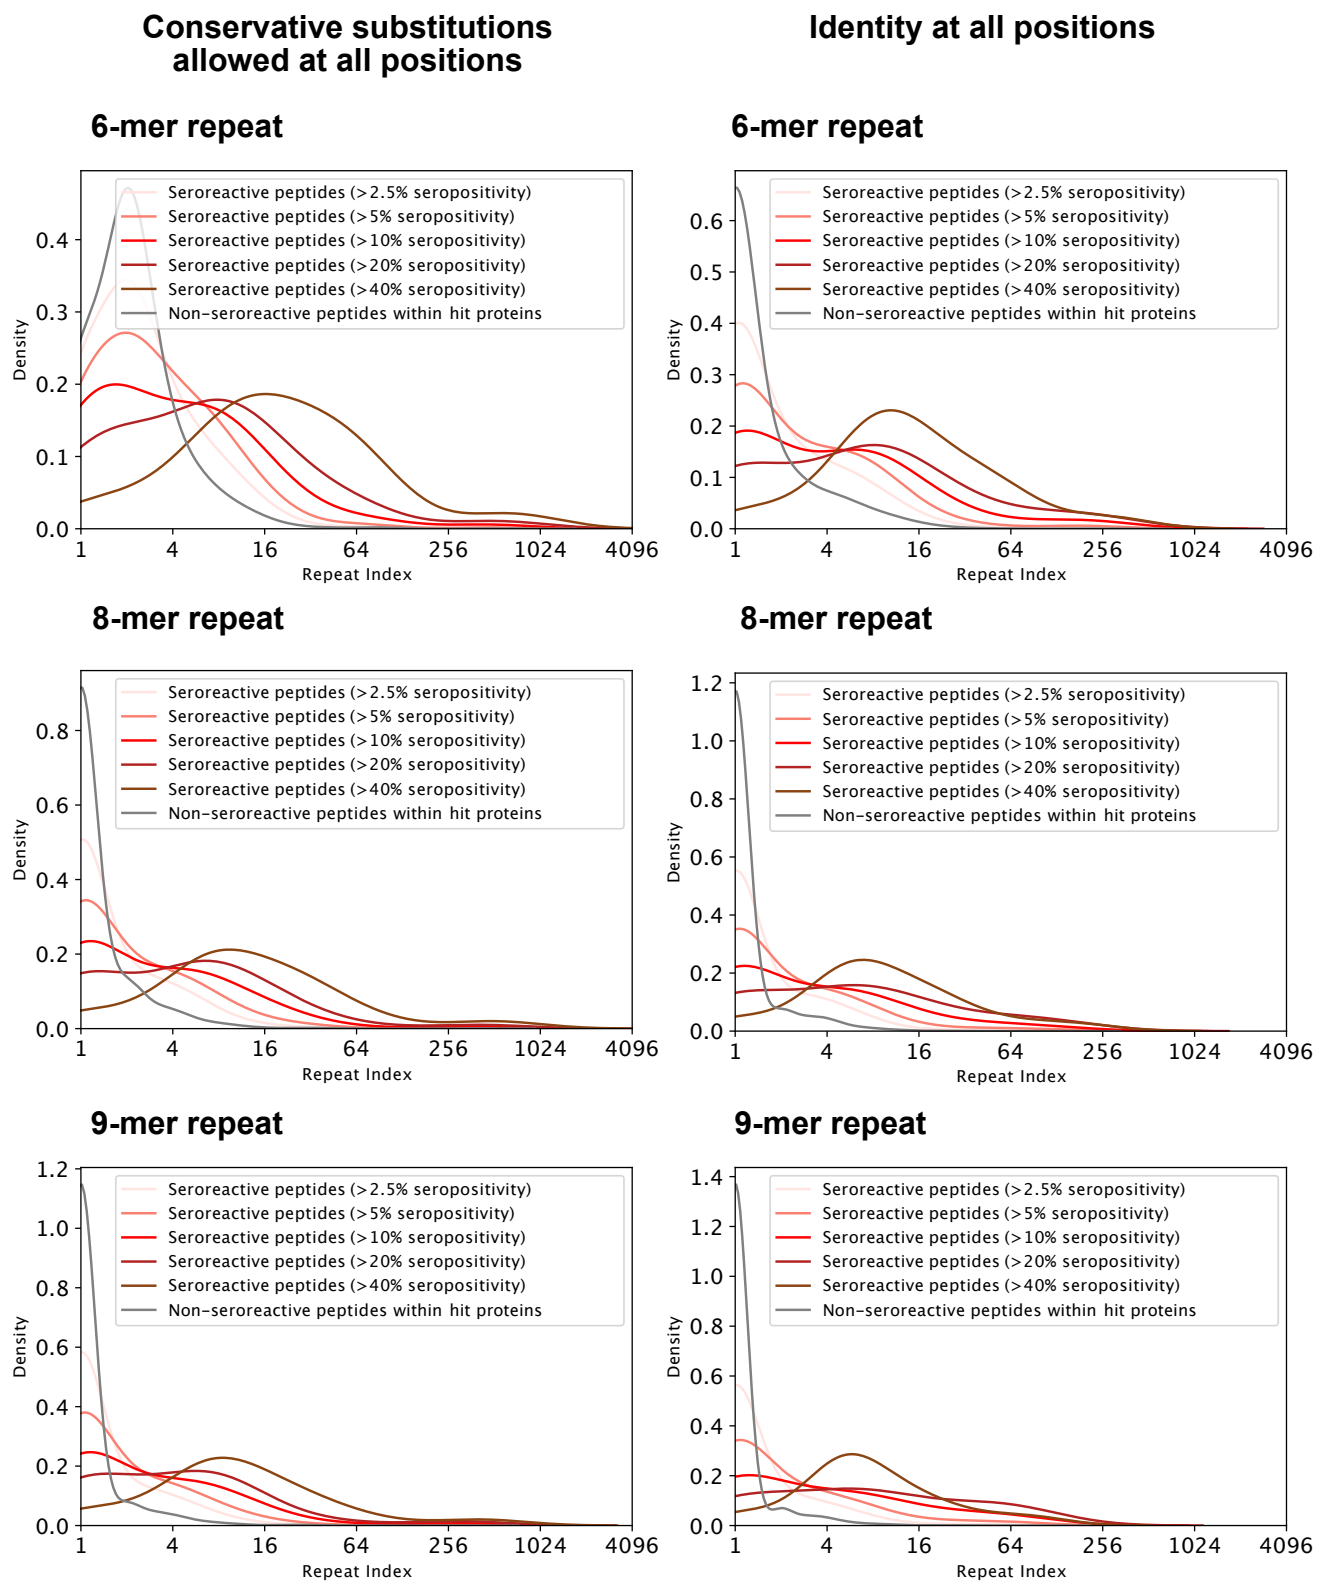

Supplement: supp [file elife-81401-supp-v1.zip]

Figure 2 - figure supplement 5

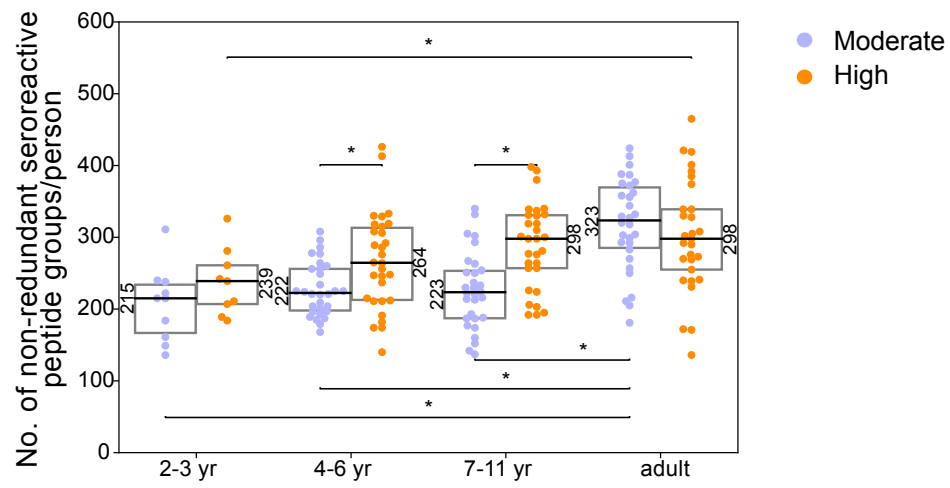

Supplement: supp [file elife-81401-supp-v1.zip]

Figure 2 - figure supplement 1

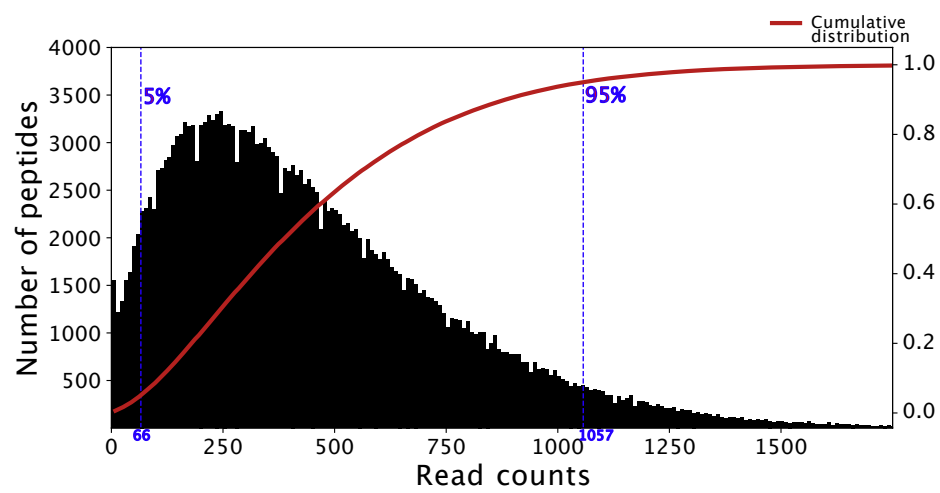

Supplement: supp [file elife-81401-supp-v1.zip]
